# Supplementary material for: Behind the Wall—Compartment-Specific Neovascularisation during Post-Stroke Recovery in Mice
Source: MDPI journal article supplement (doi:10.3390/cells11101659), 2022-05-17
Supplement: s1 [file s1]

Table S1: Antibodies used for MELC analyses.

| Target      | Company           | Clone number   | Order number |
|-------------|-------------------|----------------|--------------|
| Arginase 1  | Bioss             |                | bs-8585R     |
| CD3         | Miltenyi Biotec   | REAG1          | 130-109-838  |
| CD4         | Southern Biotech  | L3T4           | 1540-02      |
| CD8         | BD Pharmingen     | 53-6.7         | 553030       |
| CD11b       | BioRad            | M1/70.15       | MCA74F       |
| CD11c       | Miltenyi Biotec   | N418           | 130-102-799  |
| CD29        | Miltenyi Biotec   | HM $\beta$ 1-1 | 130-102-557  |
| CD31        | BD Biosciences    | MEC13.3        | 553373       |
| CD34        | Miltenyi Biotec   | REA383         | 130-117-775  |
| CD45        | Miltenyi Biotec   | 30F11.1        | 130-116-535  |
| CD62E       | Miltenyi Biotec   | REA369         | 130-105-511  |
| CD80        | Biologend         | 16-10A1        | 104706       |
| CD86        | Biologend         | GL-1           | 105002       |
| Collagen IV | Novus Biologicals | (polyclonal)   | NBP1-26549   |
| F4-80       | Biologend         | BM8            | 123107       |
| GFAP        | eBioscience       | GA5            | 53-9892-80   |
| Iba1        | Wako              | (polyclonal)   | 019-19741    |
| Ki67        | eBioscience       | SolA15         | 11-5698-80   |
| Ly6C        | eBioscience       | HK 1.4         | 17-5932-80   |
| Ly6G        | eBioscience       | RB6-8C5        | RM3005       |
| MAP2        | abcam             | (polyclonal)   | ab32454      |
| MHC II      | Miltenyi Biotec   | REA813         | 130-112-233  |
| NeuN        | Sigma Aldrich     | A60            | MAB377C3     |
| NG2         | Miltenyi Biotec   | REA969         | 130-116-141  |
| Vimentin    | Santa Cruz        | V9             | Sc-6260      |
| Vinculin    | Sigma Aldrich     | hVIN-1         | V9131        |
